# Supplementary material for: Genetic associations with mathematics tracking and persistence in secondary school
Source: PubMed Central journal article supplement (PMC7002519; doi:10.1038/s41539-020-0060-2), 2020-02-05
Supplement: 41539_2020_60_MOESM1_ESM.pdf [file 41539_2020_60_MOESM1_ESM.pdf]

# Supplementary Information for

## **Genetic Associations with Mathematics Tracking and Persistence in Secondary School**

K. Paige Harden, Benjamin W. Domingue, Daniel W. Belsky, Jason Boardman, Robert Crosnoe, Margherita Malanchini, Michel Nivard, Elliot M. Tucker-Drob, Kathleen Mullan Harris

Address correspondence to Paige Harden

Email: [harden@utexas.edu](mailto:harden@utexas.edu)

Phone: 512-471-1124

### **This PDF file includes:**

- Supplementary text
- Supplementary Figures 1-2
- Supplementary Tables 1-6
- References for SI reference citations

## Supplementary Information Text

**Descriptives.** Supplementary Tables 1 and 2, and Supplementary Figure 1 describe the analytic sample in more detail.

**Supporting Tables.** Supplementary Tables 3-6 contain estimates which we summarize in the main text.

**Sensitivity Analyses.** Supplementary Figure 2 consider non-parametric LOESS and adjacent category logit model (which do not require a homogeneous effect across categories; *c.f.*, Figure 4 from main text) as alternatives to the cumulative link models presented in main text.

**Results from Family Fixed-Effects Models.** We conducted exploratory analyses of a sample of  $N = 441$  sibling pairs. (One participant per sibling pair was selected to be included in the primary analytic sample). Within-sibling differences in genotype are entirely random, and siblings raised in the same home share many aspects of their home environments. Testing whether siblings who differ in their education-PGS also differ in their subsequent education outcomes is, therefore, a strong test of genetic effects. We used family fixed-effects regression to compare siblings raised in the same nuclear family<sup>1</sup>. As with the school fixed-effects models, we fitted two linear regression models that focused on deviations from the modal 9<sup>th</sup>-grade track (Algebra 1). The magnitude of the regression coefficients in the family fixed-effects models were consistent with other analyses in terms of sign (Table 3): When comparing students with respect to taking at least Algebra 1 in the 9<sup>th</sup>-grade, students with higher education-PGS were less likely than their siblings to be placed in a remedial track (Pre-Algebra or lower) than in Algebra 1 ( $b = 0.014$ ,  $SE = 0.040$ ). Similarly, when examining students who were in Algebra 1 or higher in the 9<sup>th</sup> grade, students with higher education-PGS were more likely than their siblings to be placed in an advanced track (Geometry or higher) versus Algebra 1 ( $b = 0.051$ ,  $SE = 0.056$ ). However, neither effect was significantly different from zero.

To analyze persistence, we used the same Poisson regression analysis of advancing steps we used in other analyses. The magnitude of the regression coefficient for the education-PGS was attenuated relative to the coefficients estimated in similar models that do not involve a within-family comparison ( $b = 0.049$ ,  $SE = 0.043$ ) and not significantly different from zero (Table 4).

Previous analyses of genetic data from trios of parents and offspring have shown that polygenic score associations with educational outcomes might partly reflect indirect genetic effects of the *parental* genotype, which are mediated via environments provided by the parent to all children in the family, *i.e.*, “genetic nurture”<sup>2,3</sup>. Consistent with this conclusion, the GWAS of educational attainment that was the basis of the education-PGS used in this study found that polygenic effect sizes were attenuated approximately 40% when comparing within-families relative to what was observed when comparing unrelated people<sup>4</sup>. As the effects of the education-PGS on tracking and persistence were not significantly different from zero, we cannot rule out the possibility that the education-PGS is reflecting the genetic endowment of the students’ parents. This indirect genetic effect could operate through environmental advantages provided by the parents (such as parental knowledge and social capital) rather than a direct effect operating through the students’ own skills and characteristics. The magnitude of the within-family coefficient for tracking, however, was similar to the effect estimated in between-family models, suggesting that these indirect genetic effects might be more relevant for understanding persistence than tracking.



**Supplementary Figure 1.** Construction of analytic sample.

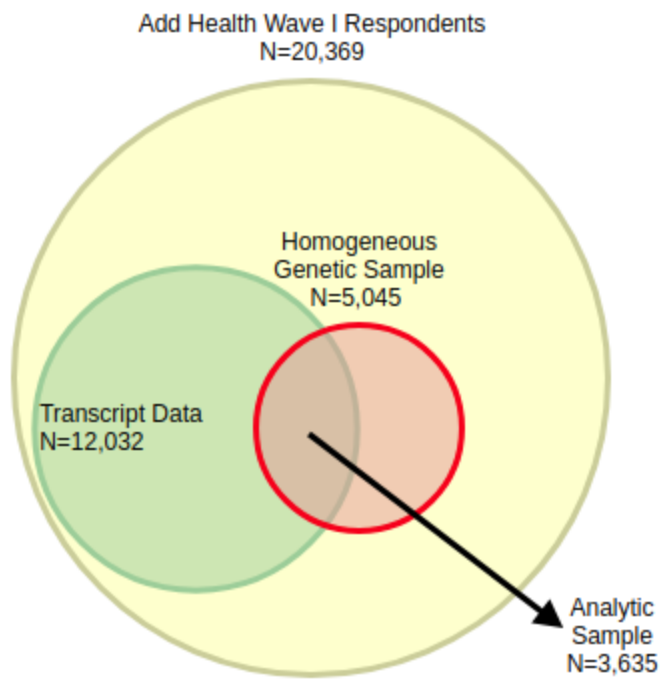

**Supplementary Figure 2.** Robustness analyses for math course placement in first year of postsecondary school. Each column considers the probability of placement in a math course relative to a course (or set of courses) immediately below as a function of EA PGS. The top row shows LOESS estimated probabilities while the bottom shows probabilities from a logit model (conditional on being female and of mean birthyear) for students in schools in the top and bottom half of the school SES distribution. Orange and blue represent relatively high and low status schools (respectively). The bottom panels represent fitted probabilities based on logistic regression models similar to the cumulative link models discussed in the main text.

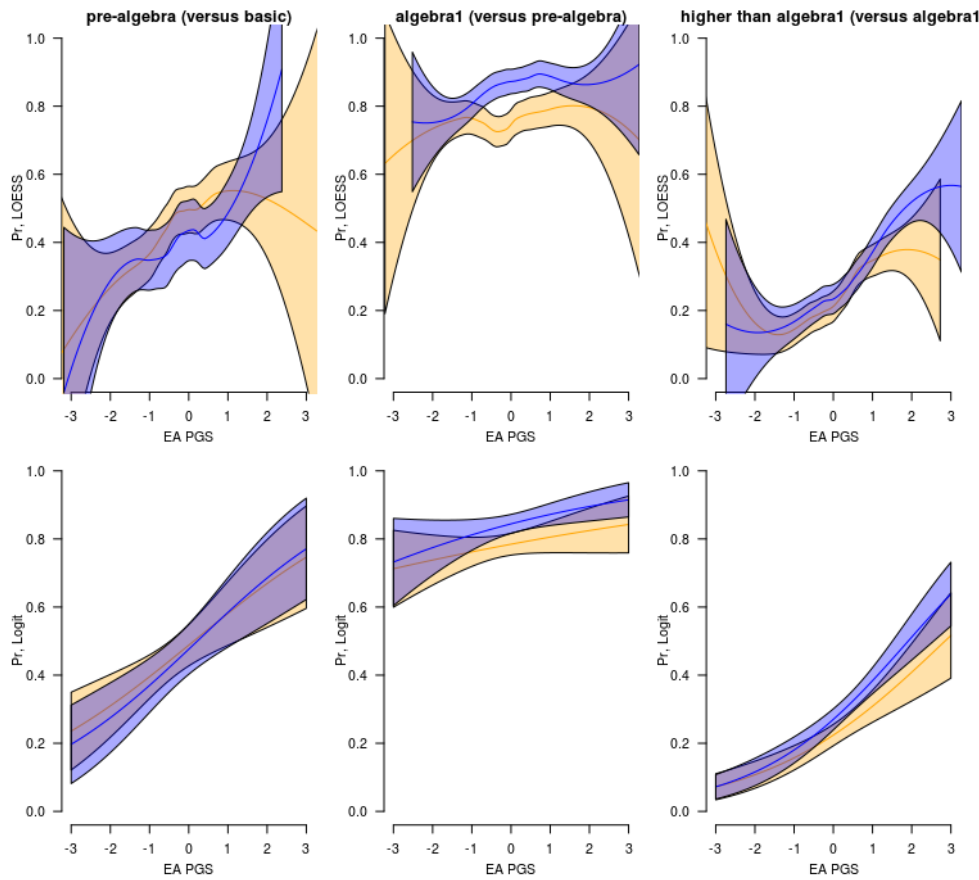

**Supplementary Table 1.** Comparison of analytic sample to full Add Health sample.

|                | All (N=20369, those with valid school id) |           |      | Transcript (N=12032) |           |      | Genetic (N=5045) |           |      | Analytic (N=3635) |           |      |
|----------------|-------------------------------------------|-----------|------|----------------------|-----------|------|------------------|-----------|------|-------------------|-----------|------|
|                | <i>Mean</i>                               | <i>SD</i> | # NA | <i>Mean</i>          | <i>SD</i> | # NA | <i>Mean</i>      | <i>SD</i> | # NA | <i>Mean</i>       | <i>SD</i> | # NA |
| Cumulative GPA | 2.57                                      | 0.84      | 8408 | 2.57                 | 0.84      | 71   | 2.69             | 0.81      | 1429 | 2.69              | 0.81      | 19   |
| SES            | 0.01                                      | 1.35      | 1392 | 0.11                 | 1.29      | 673  | 0.28             | 1.19      | 203  | 0.34              | 1.16      | 125  |
| School Status  | 0.48                                      | 0.15      | 603  | 0.48                 | 0.14      | 405  | 0.47             | 0.15      | 193  | 0.47              | 0.14      | 145  |
| Female         | 0.5                                       | 0.5       | 2    | 0.53                 | 0.5       | 0    | 0.53             | 0.5       | 0    | 0.54              | 0.5       | 0    |
| Birthyear      | 78.83                                     | 1.73      | 15   | 78.91                | 1.73      | 8    | 78.97            | 1.74      | 1    | 79.02             | 1.75      | 1    |

**Supplementary Table 2.** Percentages of students in math courses during each year of high school.

|                | Year 1 | Year 2 | Year 3 | Year 4 |
|----------------|--------|--------|--------|--------|
| No math        | 2.6    | 5.2    | 17.6   | 44.7   |
| Basic/Remedial | 4.3    | 2.6    | 1.5    | 1.1    |
| General        | 9.7    | 5.6    | 5.1    | 5.7    |
| Pre-algebra    | 12.4   | 3.4    | 1.5    | 0.7    |
| Algebra 1      | 51.3   | 21.4   | 6.6    | 2.3    |
| Geometry       | 14.6   | 36.5   | 17.6   | 5.2    |
| Algebra 2      | 4.2    | 19.1   | 24.7   | 8.3    |
| Adv Math       | 0.3    | 2.7    | 4.8    | 4.8    |
| Pre-calculus   | 0.4    | 3.1    | 19.2   | 17.2   |
| Calculus       | 0.1    | 0.2    | 1.2    | 10.0   |

**Supplementary Table 3.** Regression coefficients from models of tracking.

A. Cumulative Link Models of starting math class in 9<sup>th</sup> grade.

| A. Cumulative Link               | Baseline       | Plus SES       | Plus School SES | Plus interactions |
|----------------------------------|----------------|----------------|-----------------|-------------------|
| basic pre-algebra                | -1.829         | -1.785         | -1.464          | -1.102            |
| basic pre-algebra.se             | 0.096          | 0.094          | 0.284           | 0.299             |
| basic pre-algebra.ci             | -2.02, -1.62   | -1.95, -1.6    | -2.1, -0.979    | -1.7, -0.539      |
| pre-algebra algebra1             | -1.067         | -0.987         | -0.665          | -0.330            |
| pre-algebra algebra1.se          | 0.090          | 0.082          | 0.279           | 0.295             |
| pre-algebra algebra1.ci          | -1.24, -0.889  | -1.14, -0.84   | -1.28, -0.149   | -0.953, 0.242     |
| algebra1 higher than algebra1    | 1.457          | 1.665          | 1.994           | 2.246             |
| algebra1 higher than algebra1.se | 0.085          | 0.080          | 0.273           | 0.296             |
| algebra1 higher than algebra1.ci | 1.3, 1.63      | 1.52, 1.82     | 1.39, 2.5       | 1.65, 2.87        |
| ea3                              | 0.583          | 0.469          | 0.461           | 0.283             |
| ea3.se                           | 0.035          | 0.035          | 0.034           | 0.152             |
| ea3.ci                           | 0.516, 0.656   | 0.397, 0.53    | 0.398, 0.531    | 0.012, 0.588      |
| sexmale                          | -0.261         | -0.275         | -0.275          | -0.660            |
| sexmale.se                       | 0.061          | 0.060          | 0.063           | 0.238             |
| sexmale.ci                       | -0.389, -0.143 | -0.387, -0.147 | -0.408, -0.163  | -1.12, -0.184     |
| birthyear                        | 0.088          | 0.088          | 0.088           | 0.278             |
| birthyear.se                     | 0.035          | 0.034          | 0.033           | 0.087             |
| birthyear.ci                     | 0.0219, 0.156  | 0.0216, 0.152  | 0.0198, 0.147   | 0.13, 0.464       |
| sespc.all                        |                | 0.452          | 0.419           |                   |
| sespc.all.se                     |                | 0.039          | 0.039           |                   |
| sespc.all.ci                     |                | 0.382, 0.534   | 0.344, 0.5      |                   |
| school.hsgrad                    |                |                | 0.704           | 1.570             |
| school.hsgrad.se                 |                |                | 0.571           | 0.605             |
| school.hsgrad.ci                 |                |                | -0.671, 1.74    | 0.344, 2.81       |
| ea3:school.hsgrad                |                |                |                 | 0.592             |
| ea3:school.hsgrad.se             |                |                |                 | 0.291             |
| ea3:school.hsgrad.ci             |                |                |                 | -0.007, 1.11      |
| ea3:sexmale                      |                |                |                 | -0.049            |
| ea3:sexmale.se                   |                |                |                 | 0.066             |
| ea3:sexmale.ci                   |                |                |                 | -0.176, 0.0783    |
| ea3:birthyear                    |                |                |                 | -0.006            |
| ea3:birthyear.se                 |                |                |                 | 0.020             |
| ea3:birthyear.ci                 |                |                |                 | -0.0431, 0.0363   |
| school.hsgrad:sexmale            |                |                |                 | 0.833             |
| school.hsgrad:sexmale.se         |                |                |                 | 0.515             |
| school.hsgrad:sexmale.ci         |                |                |                 | -0.189, 1.83      |
| school.hsgrad:birthyear          |                |                |                 | -0.408            |
| school.hsgrad:birthyear.se       |                |                |                 | 0.174             |
| school.hsgrad:birthyear.ci       |                |                |                 | -0.763, -0.106    |
| N                                | 3367           | 3367           | 3367            | 3367              |



B. Logistic regression models predicting a student starting math in 9<sup>th</sup> grade in Algebra 1 or above (note: family-based analyses use linear probability models).

| B. Algebra 1 or above | Baseline       | Plus SES        | School-based  | Family-based    |
|-----------------------|----------------|-----------------|---------------|-----------------|
| ea3                   | 0.388          | 0.299           | 0.387         | 0.014           |
| ea3.se                | 0.052          | 0.051           | 0.054         | 0.040           |
| ea3.ci                | 0.29, 0.499    | 0.204, 0.405    | 0.294, 0.504  | -0.058, 0.107   |
| sexmale               | -0.191         | -0.208          | -0.245        | -0.169          |
| sexmale.se            | 0.079          | 0.079           | 0.086         | 0.073           |
| sexmale.ci            | -0.36, -0.051  | -0.352, -0.0486 | -0.43, -0.1   | -0.308, -0.0283 |
| birthyear             | 0.072          | 0.075           | 0.174         | 0.020           |
| birthyear.se          | 0.051          | 0.052           | 0.078         | 0.030           |
| birthyear.ci          | -0.0229, 0.174 | -0.0198, 0.174  | 0.0378, 0.324 | -0.0479, 0.0717 |
| sespc.all             |                | 0.380           |               |                 |
| sespc.all.se          |                | 0.050           |               |                 |
| sespc.all.ci          |                | 0.286, 0.482    |               |                 |
| (Intercept)           | 0.728          | 0.680           | 17.615        | 0.952           |
| (Intercept).se        | 0.098          | 0.107           | 8.180         | 0.135           |
| (Intercept).ci        | 0.561, 0.939   | 0.483, 0.916    | 0.0914, 17.8  | 0.538, 1.08     |
| N                     | 2719           | 2719            | 2719          | 332             |

C. Logistic regression models predicting a student starting math in 9<sup>th</sup> grade above Algebra 1 (note: family-based analyses use linear probability models).

| C. Above algebra 1 | Baseline        | Plus SES        | School-based    | Family-based   |
|--------------------|-----------------|-----------------|-----------------|----------------|
| ea3                | 0.534           | 0.451           | 0.587           | 0.051          |
| ea3.se             | 0.047           | 0.044           | 0.047           | 0.056          |
| ea3.ci             | 0.442, 0.629    | 0.361, 0.54     | 0.501, 0.681    | -0.0709, 0.156 |
| sexmale            | -0.212          | -0.220          | -0.199          | 0.007          |
| sexmale.se         | 0.089           | 0.096           | 0.092           | 0.051          |
| sexmale.ci         | -0.401, -0.0519 | -0.399, -0.0392 | -0.384, -0.0282 | -0.0736, 0.125 |
| birthyear          | 0.079           | 0.076           | 0.106           | -0.011         |
| birthyear.se       | 0.040           | 0.038           | 0.045           | 0.024          |
| birthyear.ci       | 0.00596, 0.151  | -0.00188, 0.15  | 0.0235, 0.196   | -0.041, 0.0469 |
| sespc.all          |                 | 0.379           |                 |                |
| sespc.all.se       |                 | 0.075           |                 |                |
| sespc.all.ci       |                 | 0.236, 0.522    |                 |                |
| (Intercept)        | -1.081          | -1.292          | -17.642         | -0.042         |
| (Intercept).se     | 0.099           | 0.108           | 8.085           | 0.351          |
| (Intercept).ci     | -1.27, -0.879   | -1.53, -1.09    | -18.7, -0.533   | -0.247, 0.99   |
| N                  | 2400            | 2400            | 2400            | 334            |

**Supplementary Table 4.** Regression coefficients from models of persistence.

|                      | baseline             | baseline plus<br>ses.both | baseline plus<br>ses.both+math9 | baseline.interaction | baseline.interaction.math9control | school               | fam                 |
|----------------------|----------------------|---------------------------|---------------------------------|----------------------|-----------------------------------|----------------------|---------------------|
| (Intercept)          | 0.541                | 0.383                     | 0.466                           | 0.255                | 0.313                             | 0.533                | 0.928               |
| (Intercept).se       | 0.024                | 0.089                     | 0.088                           | 0.082                | 0.088                             | 0.164                | 0.337               |
| (Intercept).ci       | 0.494, 0.589         | 0.209, 0.549              | 0.292, 0.623                    | 0.0755, 0.396        | 0.126, 0.477                      | -0.00503,<br>0.55    | 0.0163, 1.3         |
| ea3                  | 0.139                | 0.096                     | 0.087                           | 0.268                | 0.232                             | 0.117                | 0.049               |
| ea3.se               | 0.011                | 0.013                     | 0.012                           | 0.043                | 0.040                             | 0.013                | 0.043               |
| ea3.ci               | 0.117, 0.159         | 0.072, 0.12               | 0.061, 0.11                     | 0.183, 0.352         | 0.143, 0.304                      | 0.091, 0.138         | -0.038, 0.134       |
| sexmale              | -0.058               | -0.058                    | -0.050                          | -0.126               | -0.101                            | -0.060               | -0.003              |
| sexmale.se           | 0.019                | 0.019                     | 0.019                           | 0.069                | 0.064                             | 0.019                | 0.076               |
| sexmale.ci           | -0.0975, -<br>0.0229 | -0.0937, -<br>0.0205      | -0.0885, -<br>0.0146            | -0.248, 0.0224       | -0.211, 0.0415                    | -0.0992, -<br>0.0269 | -0.199, 0.106       |
| birthyear            | -0.008               | -0.009                    | -0.012                          | 0.005                | -0.009                            | 0.002                | -0.044              |
| birthyear.se         | 0.010                | 0.010                     | 0.011                           | 0.036                | 0.038                             | 0.012                | 0.022               |
| birthyear.ci         | -0.0262,<br>0.0119   | -0.0276,<br>0.011         | -0.0342,<br>0.0113              | -0.0584, 0.0819      | -0.0839, 0.0635                   | -0.0188,<br>0.0259   | -0.0808,<br>0.00843 |
| sespc.all            |                      | 0.120                     | 0.106                           |                      |                                   |                      |                     |
| sespc.all.se         |                      | 0.015                     | 0.014                           |                      |                                   |                      |                     |
| sespc.all.ci         |                      | 0.089, 0.147              | 0.0779, 0.133                   |                      |                                   |                      |                     |
| school.hsgrad        |                      | 0.234                     | 0.210                           | 0.613                | 0.633                             |                      |                     |
| school.hsgrad.se     |                      | 0.171                     | 0.166                           | 0.154                | 0.153                             |                      |                     |
| school.hsgrad.ci     |                      | -0.097, 0.572             | -0.099, 0.534                   | 0.349, 0.973         | 0.341, 0.943                      |                      |                     |
| math.start-1         |                      |                           | -0.221                          |                      | -0.112                            |                      |                     |
| math.start-1.se      |                      |                           | 0.038                           |                      | 0.121                             |                      |                     |
| math.start-1.ci      |                      |                           | -0.293, -0.147                  |                      | -0.339, 0.142                     |                      |                     |
| math.start1          |                      |                           | -0.059                          |                      | 0.068                             |                      |                     |
| math.start1.se       |                      |                           | 0.044                           |                      | 0.183                             |                      |                     |
| math.start1.ci       |                      |                           | -0.147, 0.020                   |                      | -0.285, 0.429                     |                      |                     |
| ea3:school.hsgrad    |                      |                           |                                 | -0.304               | -0.282                            |                      |                     |
| ea3:school.hsgrad.se |                      |                           |                                 | 0.074                | 0.072                             |                      |                     |
| ea3:school.hsgrad.ci |                      |                           |                                 | -0.443, -0.147       | -0.41, -0.131                     |                      |                     |

|                               |      |      |      |                  |                  |      |     |
|-------------------------------|------|------|------|------------------|------------------|------|-----|
| ea3:sexmale                   |      |      |      | 0.008            | 0.010            |      |     |
| ea3:sexmale.se                |      |      |      | 0.022            | 0.020            |      |     |
| ea3:sexmale.ci                |      |      |      | -0.0308, 0.0543  | -0.0279, 0.0496  |      |     |
| ea3:birthyear                 |      |      |      | -0.001           | 0.000            |      |     |
| ea3:birthyear.se              |      |      |      | 0.005            | 0.006            |      |     |
| ea3:birthyear.ci              |      |      |      | -0.0098, 0.00947 | -0.00937, 0.0118 |      |     |
| school.hsgrad:sexmale         |      |      |      | 0.135            | 0.106            |      |     |
| school.hsgrad:sexmale.se      |      |      |      | 0.139            | 0.128            |      |     |
| school.hsgrad:sexmale.ci      |      |      |      | -0.164, 0.381    | -0.185, 0.323    |      |     |
| school.hsgrad:birthyear       |      |      |      | -0.027           | -0.007           |      |     |
| school.hsgrad:birthyear.se    |      |      |      | 0.064            | 0.066            |      |     |
| school.hsgrad:birthyear.ci    |      |      |      | -0.172, 0.0868   | -0.141, 0.115    |      |     |
| ea3:math.start-1              |      |      |      |                  | 0.026            |      |     |
| ea3:math.start-1.se           |      |      |      |                  | 0.023            |      |     |
| ea3:math.start-1.ci           |      |      |      |                  | -0.0182, 0.0703  |      |     |
| ea3:math.start1               |      |      |      |                  | -0.003           |      |     |
| ea3:math.start1.se            |      |      |      |                  | 0.029            |      |     |
| ea3:math.start1.ci            |      |      |      |                  | -0.055, 0.0543   |      |     |
| school.hsgrad:math.start-1    |      |      |      |                  | -0.307           |      |     |
| school.hsgrad:math.start-1.se |      |      |      |                  | 0.236            |      |     |
| school.hsgrad:math.start-1.ci |      |      |      |                  | -0.791, 0.133    |      |     |
| school.hsgrad:math.start1     |      |      |      |                  | -0.171           |      |     |
| school.hsgrad:math.start1.se  |      |      |      |                  | 0.334            |      |     |
| school.hsgrad:math.start1.ci  |      |      |      |                  | -0.891, 0.472    |      |     |
| N                             | 3367 | 3367 | 3367 | 3367             | 3367             | 3367 | 441 |

**Supplementary Table 5.** Regression coefficients from year-by-year models of persistence.

|                  | Grade 9 to Grade 10 |                | Grade 10 to Grade 11 |                    | Grade 11 to Grade 12 |                    |
|------------------|---------------------|----------------|----------------------|--------------------|----------------------|--------------------|
| (Intercept)      | 1.930               | 1.219          | 0.988                | 0.296              | 0.054                | -0.507             |
| (Intercept).se   | 0.466               | 0.461          | 0.293                | 0.319              | 0.246                | 0.264              |
| (Intercept).ci   | 0.976, 2.86         | 0.375, 2.23    | 0.468, 1.61          | -0.296, 0.92       | -0.394, 0.563        | -1.01, 0.0303      |
| ea3              | 0.288               | 0.234          | 0.220                | 0.143              | 0.167                | 0.123              |
| ea3.se           | 0.094               | 0.102          | 0.046                | 0.052              | 0.044                | 0.038              |
| ea3.ci           | 0.129, 0.499        | 0.045, 0.444   | 0.127, 0.307         | 0.043, 0.237       | 0.078, 0.249         | 0.045, 0.199       |
| sespc.all        | 0.199               | 0.104          | 0.233                | 0.182              | 0.154                | 0.109              |
| sespc.all.se     | 0.059               | 0.069          | 0.060                | 0.059              | 0.044                | 0.043              |
| sespc.all.ci     | 0.082, 0.308        | -0.0336, 0.246 | 0.111, 0.352         | 0.068, 0.29        | 0.0569, 0.232        | 0.0219, 0.196      |
| school.hsgrad    | 2.931               | 2.717          | 1.650                | 1.654              | 0.652                | 0.720              |
| school.hsgrad.se | 0.891               | 0.945          | 0.612                | 0.688              | 0.508                | 0.498              |
| school.hsgrad.ci | 1.36, 4.61          | 1.02, 4.59     | 0.394, 2.84          | 0.336, 3           | -0.393, 1.6          | -0.266, 1.72       |
| sexmale          | -0.302              | -0.183         | -0.236               | -0.117             | 0.161                | 0.245              |
| sexmale.se       | 0.178               | 0.168          | 0.109                | 0.103              | 0.093                | 0.094              |
| sexmale.ci       | -0.657, 0.0389      | -0.491, 0.167  | -0.476, -<br>0.0458  | -0.337, 0.0591     | -0.00457,<br>0.363   | 0.0739, 0.415      |
| birthyear        | -0.050              | -0.062         | 0.021                | 0.017              | -0.023               | -0.033             |
| birthyear.se     | 0.056               | 0.058          | 0.036                | 0.039              | 0.026                | 0.026              |
| birthyear.ci     | -0.17, 0.0637       | -0.183, 0.0453 | -0.0478,<br>0.0877   | -0.0666,<br>0.0938 | -0.0737,<br>0.0254   | -0.0797,<br>0.0188 |
| gpa              |                     | 0.370          |                      | 0.302              |                      | 0.231              |
| gpa.se           |                     | 0.080          |                      | 0.046              |                      | 0.054              |
| gpa.ci           |                     | 0.218, 0.527   |                      | 0.222, 0.389       |                      | 0.125, 0.326       |
| N                | 3676                | 3652           | 3573                 | 3539               | 3087                 | 3050               |

**Supplementary Table 6.** Regression coefficients from models of highest math credential.

|                            | Highest math is at<br>least Algebra 2 | Highest math is<br>calculus |
|----------------------------|---------------------------------------|-----------------------------|
| (Intercept)                | -0.041                                | -3.534                      |
| (Intercept).se             | 0.331                                 | 0.712                       |
| (Intercept).ci             | -0.644, 0.641                         | -4.8, -1.99                 |
| ea3                        | 0.466                                 | 0.897                       |
| ea3.se                     | 0.158                                 | 0.246                       |
| ea3.ci                     | 0.167, 0.781                          | 0.414, 1.37                 |
| school.hsgrad              | 1.867                                 | 2.406                       |
| school.hsgrad.se           | 0.647                                 | 1.456                       |
| school.hsgrad.ci           | 0.551, 3.1                            | -0.978, 4.67                |
| sexmale                    | -0.350                                | -0.662                      |
| sexmale.se                 | 0.300                                 | 0.573                       |
| sexmale.ci                 | -0.958, 0.19                          | -1.72, 0.476                |
| birthyear                  | 0.232                                 | 0.367                       |
| birthyear.se               | 0.092                                 | 0.158                       |
| birthyear.ci               | 0.0667, 0.421                         | 0.0404, 0.662               |
| ea3:school.hsgrad          | 0.313                                 | -0.385                      |
| ea3:school.hsgrad.se       | 0.314                                 | 0.478                       |
| ea3:school.hsgrad.ci       | -0.296, 0.9                           | -1.18, 0.592                |
| ea3:sexmale                | -0.029                                | 0.015                       |
| ea3:sexmale.se             | 0.081                                 | 0.137                       |
| ea3:sexmale.ci             | -0.178, 0.14                          | -0.247, 0.274               |
| ea3:birthyear              | 0.031                                 | -0.014                      |
| ea3:birthyear.se           | 0.027                                 | 0.038                       |
| ea3:birthyear.ci           | -0.0226,<br>0.0824                    | -0.0972,<br>0.0549          |
| school.hsgrad:sexmale      | -0.010                                | 1.148                       |
| school.hsgrad:sexmale.se   | 0.672                                 | 1.165                       |
| school.hsgrad:sexmale.ci   | -1.22, 1.28                           | -1.16, 3.48                 |
| school.hsgrad:birthyear    | -0.454                                | -0.550                      |
| school.hsgrad:birthyear.se | 0.200                                 | 0.297                       |
| school.hsgrad:birthyear.ci | -0.857, -<br>0.0753                   | -1.05, 0.119                |
| N                          | 3367                                  | 3367                        |

### Supplementary References

1. Fletcher, J. M. Social interactions and college enrollment: A combined school fixed effects/instrumental variables approach. *Soc Sci Res* **52**, 494–507 (2015).
2. Kong, A. *et al.* The nature of nurture: Effects of parental genotypes. *Science* **359**, 424–428 (2018).
3. Koellinger, P. D. & Harden, K. P. Using nature to understand nurture. *Science* **359**, 386–387 (2018).
4. Lee, J. J. *et al.* Gene discovery and polygenic prediction from a genome-wide association study of educational attainment in 1.1 million individuals. *Nature Genetics* **50**, 1112–1121 (2018).
